# Supplementary material
Source: publisher figshare collection journal article supplement (https://sage.figshare.com/ndownloader/files/15254540)
Supplement: Supplementary file 1 [file 15254540]

## Appendix D

### *Semi-structured interview questions*

#### **Interview questions for participants with acquired brain injury (ABI)**

##### *Original questions*

1. Tell me about how you manage your own money or finances?
2. What tasks or activities do you participate in to manage your money or finances?
3. Do you use any strategies to help you manage your money or finances?
4. Could you describe how managing your money or finances now is the same or different from before you had a brain injury?
5. Can you describe the financial management transitions or changes you experienced right after you had your brain injury? Later on after your injury occurred (e.g., months or years later)?
6. What events or experiences prompted changes over time, if any, to how you manage your money or finances? What were you or others around you noticing?
7. Who, if anyone, helps or assists you in managing your money or finances? How do they help or support you? *This could be a specific person, group of people, or an organization.*
8. What is easy and what is harder for you when managing your money or finances?

##### *Added questions for theoretical sampling (for 5/10 ABI-interviews)*

9. How do you know or judge that you are managing your finances well or not well?
10. If at all, how has ABI affected your financial future or financial planning for the future (e.g., retirement/older age planning)?
11. If any, what are the things you worry about or plan for in your financial future?

#### **Interview questions for close-other participants**

##### *Original questions*

1. Tell me about how you help [him/her] manage [his/her] money or finances?
2. What money or financial management tasks or activities do you assist or help [him/her] with?
3. How did you become involved in helping [him/her] with managing [his/her] finances?
4. What events or experiences prompted changes over time, if any, to how that person managed [his/her] money or finances? What were you noticing?
5. Are there any current areas of managing money or finances that you think are harder for [him/her] or that [he/she] struggles with?

##### *Added question for theoretical sampling (for 1/2 close-other interviews)*

6. How do you know or judge that [she/he] is managing finances well?
7. How has ABI affected the person's (with ABI) financial future or financial planning for the future?
8. If anything, what do you think [she/he] is currently doing to plan for [her/his] financial future?
